# Supplementary material for: Characteristics and outcomes of patients undergoing high-dose chemotherapy and autologous stem cell transplantation admitted to the intensive care unit: a single-center retrospective analysis
Source: Springer Nature journal article supplement (doi:10.1007/s00277-022-05028-x), 2022-11-17

# Supplemental Figure 1

## A

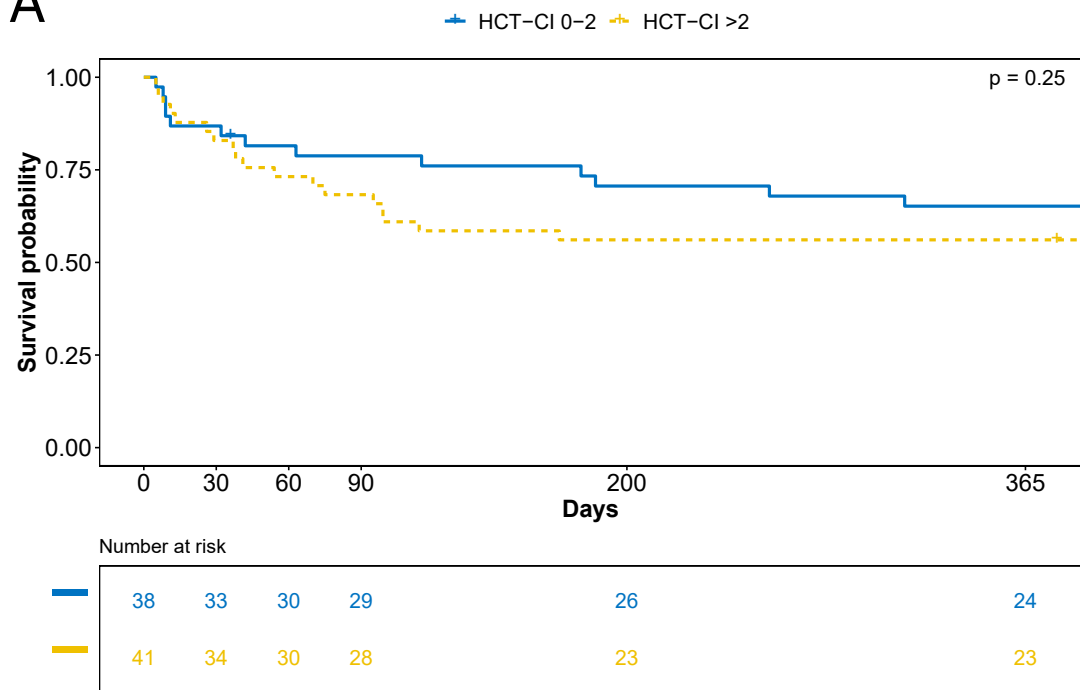

## B

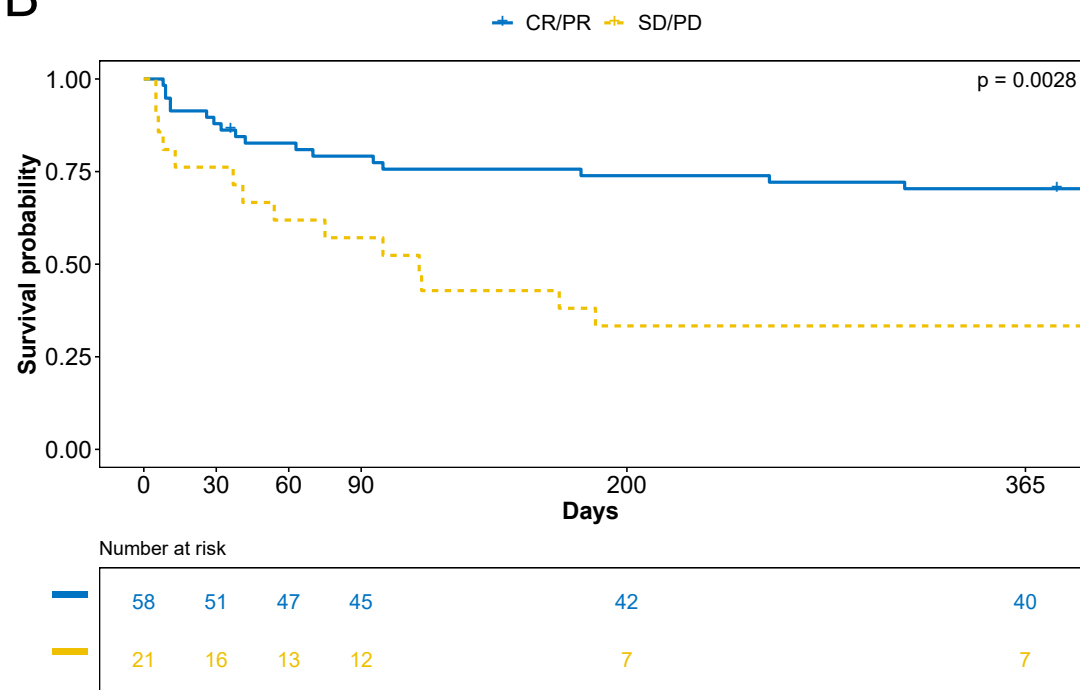

## C

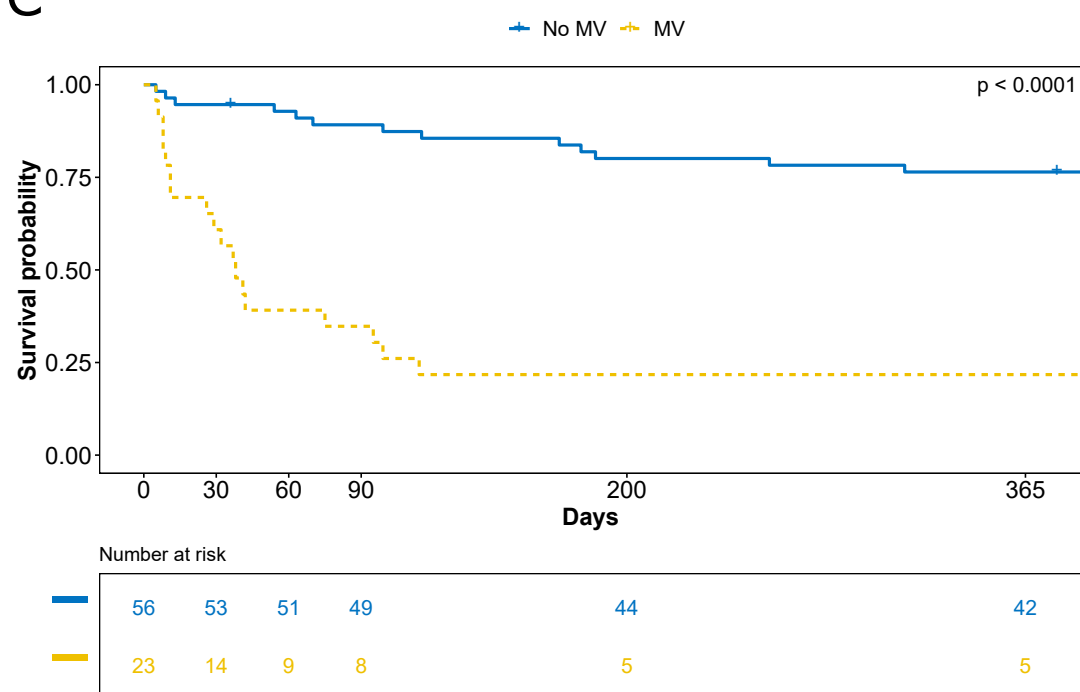

Supplement: MOESM1 [file 23722846]
